# Supplementary material for: Challenging the Cancer Molecular Stratification Dogma: Intratumoral Heterogeneity Undermines Consensus Molecular Subtypes and Potential Diagnostic Value in Colorectal Cancer
Source: Oxford University Press journal article supplement (doi:10.1158/1078-0432.ccr-16-0032), 2016-05-06
Supplement: 10780432ccr160032-sup-160546_1_supp_0_k6krx3.docx [file 10780432ccr160032-sup-160546_1_supp_0_k6krx3.docx]

**Supplementary Figure 1: Project outline.**

Patient samples which fulfilled QC criteria were selected and annotated. Representative H&E images of central tumor, invasive front and lymph node regions used for nucleic acid extraction are shown. Following microarray profiling, differential gene expression analysis was performed alongside supervised machine learning to generate a classifier for identifying samples from central or invasive regions.

**Supplementary Table 1: Clinico-pathological information for the 25 patients who were the source of the samples employed in this study.** M = Male; F = Female; LVI = Lymphovascular Invasion

**Supplementary Table 2: Differentially expressed gene list contrasting tumor region of origin between CT-IF.**

**Supplementary Table 3: Differentially expressed gene list contrasting tumor region of origin between CT-LN.**

**Supplementary Table 4: Differentially expressed gene list contrasting tumor region of origin between LN-IF.**
